30

31 **Abstract**

32 The recruitment of leukocyte to high endothelium venules and their migration to the  
33 lymph nodes are critical steps to initiate an immune response. Cell migration is  
34 regulated by the actin cytoskeleton where myosins have a very import role. Myo1e  
35 is a long tail class I myosin highly expressed in B cells that not have been studied  
36 in the context of cell migration. By using an *in vivo* model, through the use of  
37 intravital microscopy, we demonstrated the relevance of Myo1e in the adhesion  
38 and the migration of B cells in high endothelial venules. These observations were  
39 confirmed by *in vitro* experiments. We also registered a reduction in the expression  
40 of integrins and F-actin in the protrusion of B lymphocytes membrane. Deficiencies  
41 in vesicular trafficking can explain the decrease of integrins on the surface.

42 Interestingly, Myo1e is associated with focal adhesion kinase (FAK). The lack of  
43 Myo1e affected the phosphorylation of FAK and AKT, and the activity of RAC-1,  
44 disturbing the FAK/PI3K/RAC-1 signaling pathway. Together, our results indicate  
45 critical participation of Myo1e in the mechanism of B cell migration.

46

47

48

49

50

51

52

53

54

55

56

57

58

59

60

61

62 **Introduction.**

63 The secondary lymphoid organs have a critical role in immunity. Their distribution  
64 in the body allows the recruitment of immune cells for encountering antigens  
65 (Okada and Cyster, 2006, Pereira et al., 2010, Mesin et al., 2016). The  
66 lymphocytes adhere to high endothelial venules (HEV) for crossing to lymph nodes  
67 to look for their antigen and to mount an immune response. The adhesion and  
68 migration are mediated by highly controlled mechanisms regulated by integrins,  
69 adhesins, chemokines and the actin cytoskeleton (Anderson and Anderson, 1976,  
70 Mionnet et al., 2011, Girard et al., 2012). The dysregulation of these molecules can  
71 cause a reduction in migration and recruitment of lymphocytes affecting the  
72 immune response. Therefore, it is necessary to analyze the elements in detail to  
73 better understand the mechanism of migration.

74 Cell migration consists of various steps highly regulated by signaling molecules  
75 (i.e., GTPases, kinases or motor proteins) (Mayor and Etienne-Manneville, 2016,  
76 Vicente-Manzanares et al., 2005, De Pascalis and Etienne-Manneville, 2017,  
77 Mitchison and Cramer, 1996) that control morphological changes needed for the  
78 movements of the cells (Mitchison and Cramer, 1996). These changes, modulated  
79 by alterations in the cytoskeleton, control the extensions of their plasma membrane  
80 (Santos-Argumedo et al., 1997, Maravillas-Montero et al., 2011). Myosins are  
81 motor proteins included in 18 families (Thompson and Langford, 2002) and  
82 expressed by different tissues and organisms (Sellers, 2000). Class I myosins are  
83 single head molecules that can bind to the actin filaments and the plasma  
84 membrane (Osherov and May, 2000). The functions of class I myosin are  
85 associated with the regulation of motility and adhesion. Myo1e is highly expressed  
86 by macrophages, dendritic cells, and B cells (Santos-Argumedo et al., 2013,  
87 Wenzel et al., 2015). In macrophage and dendritic cells, Myo1e have a role in  
88 antigen presentation due to the association of Myo1e with ARF7EP (Paul et al.,  
89 2011). The absence of Myo1e affects the transport of MHC-II to the plasma  
90 membrane. Additionally, the lack of Myo1e in activated macrophages reduce their  
91 cellular spreading (Tanimura et al., 2016). In the case of Myo1f, studies using

92 intravital microscopy have shown the relevance of this protein in the extravasation,  
93 migration, and deformation of the nucleus of neutrophils (Salvermoser et al., 2018).  
94 While, in infections with *Listeria monocytogenes*, the motility of neutrophils is  
95 reduced (Kim et al., 2006). Given, the capacity of long tail class I myosin in  
96 regulating the migration and adhesion, this study focused on the evaluation of  
97 Myo1e during B cells migration. Here we report that the long tail Myo1e  
98 participates in the adhesion and slow rolling of B cells in HEV of the inguinal lymph  
99 node. By *in vitro* assays, we demonstrated that the loss of Myo1e causes a  
100 reduction in the expression of integrins in the membrane and is associated with the  
101 PI3K/FAK/RAC-1 signaling pathway. Thus, these results indicate the critical  
102 participation of the Myo1e in the process of migration and its possible functions in  
103 the regulation of adhesion and extravasation.

104

105

106

107

108

109

110

111

112

113

114

115

116

117

118

119

120

121

122

123

124

125 **Results.**

126

127 **In the absence of Myo1e, there is inefficient recruitment of B cells to the**  
128 **inguinal lymph node**

129 The recruitment of leukocytes to the lymph nodes is a critical step for mounting an  
130 immune response; this process involves the rolling and adhesion of leukocytes to  
131 the venules of the high endothelium (Kansas et al., 1993). We investigated whether  
132 Myo1e, expressed by B cells (Santos-Argumedo et al., 2013, Maravillas-Montero et  
133 al., 2011) affects the adhesion and the motility of these cells to the venules of the  
134 high endothelium. Therefore, the migration of activated B cells from control mice  
135 (Myo1e<sup>+/+</sup>) was compared with Myo1e-deficient mice (Myo1e<sup>-/-</sup>). Hoescht 33342-  
136 labeled B cells were injected into a host wild type mouse. The adhesion, rolling and  
137 migration was evaluated by intravital microscopy in the inguinal lymph node using  
138 CXCL12 as a chemoattractant.

139 First of all, the venules of the lymphatic node of the host mouse were evaluated,  
140 where the parameters proposed by Von Adrian UH in 1996 were analyzed (Von  
141 Adrian, 1996), Those parameters include the numbering of the branches of the  
142 inguinal lymph node from I to IV (Fig.S1), as well as the diameter and blood flow of  
143 the different venules (Fig. S2A-B). Subsequently, the migration of B cell in the  
144 absence of any additional chemokine (vehicle), was registered for both the B cells  
145 obtained from control mice and Myo1e<sup>-/-</sup> mice. In both situations, the adhesion and  
146 migration were negligible (Video Movie 1-2, (Duration 00.29 seconds). In sharp  
147 contrast, when the chemoattractant CXCL12 was used, lower adhesion and  
148 reduced migration were observed for B cells originated from Myo1e-deficient mice  
149 (Myo1e<sup>-/-</sup>) when compared with control mice (Myo1e<sup>+/+</sup>) (Video Movie 3-4)  
150 (Duration 00:29 seconds).

151

152 **Myo1e is essential for the recruitment and adhesion of B cells to the inguinal**  
153 **lymph node**

154 Derived from the previous observations, the recruitment of B cells, in the absence  
155 of Myo1e, was investigated in further detail. As can be seen in Fig. 1A-B, there is a  
156 reduction in the recruitment of B cells from Myo1e<sup>-/-</sup> mice, regardless of time.  
157 Additionally, there is an increase in cell flow in venules I and II in Myo1e<sup>-/-</sup> B cells  
158 compared with the control mice (Myo1e<sup>+/+</sup>) (Fig. 1C-D). In correspondence with the  
159 previous results, we registered reduced adherence of Myo1e<sup>-/-</sup> B cells to the III and  
160 IV venules. These venules contain high endothelial cells (Fig.1E). These results  
161 suggest that Myo1e modulates the migration of B cells into the inguinal lymph  
162 node.

163

### 164 **The deficiency of Myo1e affects the speed and the slow rolling of B** 165 **lymphocytes**

166 To follow with the characterization of the motility of B lymphocytes, we evaluated  
167 the time it takes to B cells of travel from venule IV to I (Fig. 2A). We registered an  
168 increase in the rolling of the B cells from Myo1e<sup>-/-</sup> mice traveling in venules IV and  
169 III, compared with B cells from wild type mice (Fig. 2B). In contrast, the analysis of  
170 "slow rolling" (frequency of leukocytes with a rolling velocity less than 5 μm/sec),  
171 (Weninger et al., 2000), showed a reduction in this parameter by B cells from  
172 Myo1e<sup>-/-</sup> mice (Fig. 2C). Both results reflect an increase in the speed of B cells from  
173 Myo1e<sup>-/-</sup> mice compared with Myo1e<sup>+/+</sup> mice (Fig. 2D). These results agree with the  
174 reduction in cellular transmigration (Fig S3) and indicate that Myo1e participates in  
175 the adherence and rolling of B lymphocytes to HEV.

176

### 177 **The loss of Myo1e in B cells affects their CXCL12-dependent homing to the** 178 **inguinal lymph node**

179 To corroborate our findings, homing assays were performed in which the right  
180 lymph node was inoculated with CXCL12, while the left lymph node was injected  
181 with the vehicle (Fig. S4). Subsequently, CFSE-labeled activated B cells from  
182 Myo1e<sup>+/+</sup> and Myo1e<sup>-/-</sup> mice were injected in different cell proportions into a host  
183 wild type mouse. We found a reduction in the recruitment of Myo1e deficient B  
184 cells in the right, but not in the left lymph node (Fig. S4B). To further corroborate

185 these results, images were taken by intravital microscopy where, compared with  
186 the right inguinal lymph node, and left lymph node (Supplementary Fig. 4C-D). In  
187 contrast, we found more Myo1e<sup>-/-</sup> B cells recirculating in the blood and the spleen,  
188 indicating that those cells were not recruited into the lymph node (Fig S5). These  
189 findings demonstrate that Myo1e is critical to modulate the process of B cell  
190 migration.

191

### 192 **Myo1e modulate the chemotaxis of B lymphocytes**

193 To analyze how the absence of Myo1e affect chemotaxis, the migration of resting  
194 and activated B lymphocytes was evaluated in a Zigmond chamber. Myo1e-  
195 deficient activated B cells showed reduced trajectories in comparison with  
196 activated B cells from wild type control mice (Fig. 3A). This deficiency was also  
197 reflected in the direction ratio (angles that makes a straight line when changing  
198 directions) (Fig. 3B), Euclidian distance (straight line distance between two points),  
199 accumulated distance (total distance traveled between two points) (Fig. 3C); and,  
200 the velocity (Fig. 3D). In the experiments, using resting B cells, we did not find any  
201 difference (Fig. S6). Because the differences were only found using activated B  
202 lymphocytes, the following experiments were performed using these cells. These  
203 results indicate the critical relevance of Myo1e in the migration.

204

### 205 **Myo1e regulates the expression of integrins and adhesion molecules,** 206 **affecting cell adhesion.**

207 Integrins and adhesion molecules strongly modulate cell migration in different cells  
208 and tissues (Walling and Kim, 2018, Senbanjo and Chellaiah, 2017, Chuluyan and  
209 Issekutz, 1993, Manevich et al., 2007, Smith et al., 2003, Gerberick et al., 1997).  
210 These molecules allow the adherence of the cells to the extracellular matrix, which  
211 serves as a support for the elongation of the membrane to generate the force  
212 needed for motility (Francois et al., 2016, Sales et al., 2019, Doyle et al., 2015).  
213 Due we found defects in the motility of Myo1e-deficient B cells, we measured how  
214 were the relative amount of LFA-1, CD44, and VLA-4 in activated B cells from  
215 Myo1e<sup>-/-</sup> B cells compared with the control wild type mice. The analysis of the

216 mean fluorescence intensity (MFI) in activated B cells from Myo1e<sup>-/-</sup> mice showed a  
217 reduced amount of LFA-1, CD44, and VLA-4 on the membrane of these mice  
218 compared with B cells from Myo1e<sup>+/+</sup> mice (Fig. S7A). In the experiments, using  
219 resting B cells, we did not find any difference (Fig. S8). Also, when the full  
220 expression of these adhesion molecules was analyzed, no significant differences  
221 were found; other proteins, such as CXCR4, TLR-4 and CD62-L did not show  
222 these differences (Fig. S9). The decrease in LFA-1, CD44, and VLA-4. In adhesion  
223 assays using a monolayer of b.End3 cells the activated B cells Myo1e<sup>-/-</sup> mice,  
224 have a reduced capacity of adhesion in comparison with the Myo1e<sup>+/+</sup>. (Fig. S7B-  
225 C)). These data suggest that Myo1e modulates cell migration through controlling  
226 the expression of LFA-1, CD44, and VLA-4 on the surface.

227

### 228 **Cell transmigration and membrane prolongation requires the presence of** 229 **Myo1e**

230 We next evaluated adhesion on specific substrates (fibronectin, hyaluronate acid  
231 and poly-L-Lysine as control). Myo1e-deficient activated B lymphocytes showed a  
232 significative reduced adherence to fibronectin and hyaluronic acid compared with B  
233 cells from Myo1e<sup>+/+</sup> mice (Figure. 4A). The adhesion to a non-specific substrate like  
234 poly-L-Lysine did not show differences. In the experiments, using resting B cells,  
235 we did not find any difference (Fig. S10A). To extend this observation, we  
236 analyzed cellular transmigration through monolayers of b.End3 cells (brain  
237 endothelial cell line from SV129 mice) in a trans-well chamber. We found a  
238 reduction in the transmigration of activated B cells when Myo1e was absent, but  
239 not in resting B cells (Fig. 4B and Fig. S10B). Interestingly, when measuring the  
240 membrane extensions in activated B cells, Myo1e<sup>-/-</sup> B cells exhibited reduced  
241 membrane prolongations (Fig. 4C-D). These observations agree with a defective  
242 migration of B lymphocytes from Myo1e<sup>-/-</sup> mice due to their reduced adhesion to  
243 the substrate.

244

### 245 **The localization of integrins in the membrane protrusions is affected by the** 246 **absence of Myo1e and FAK is physically and functionally associated with it**



247 To determine how Myo1e is involved in the signaling mediated by integrins, the  
248 pixel intensity of LFA-1 in the protrusion was measured. We found a lower signal  
249 intensity in the protrusions of B lymphocytes from Myo1e<sup>-/-</sup> mice, (Fig. 5A); in  
250 contrast, the expression of CXCR4 was not reduced (Fig S11A-B).

251 Because the focal adhesion kinase (FAK) is a protein that plays a critical role in  
252 integrin-mediated signal transduction, we looked if there was an association  
253 between FAK and Myo1e. We also searched for the phosphorylation at tyrosine  
254 397 of FAK in B cells that were stimulated with CXCL12. The results showed that  
255 Myo1e could be co-immunoprecipitated with FAK. This association is stronger in  
256 activated Myo1e<sup>+/+</sup> B cells (Fig 5B). Interestingly, FAK<sup>Y397</sup> become phosphorylated  
257 in activated wild type B cells that were stimulated with CXCL12 (Fig. 5C-D). The  
258 phosphorylation is higher in wild type B cells compared with Myo1e<sup>-/-</sup> B cells. These  
259 results showed a physical and functional association between FAK and Myo1e,  
260 suggesting that Myo1e is enclosed in the signaling pathway of integrins.

261

### 262 **Myo1e interacts with CARMIL affecting the polymerization of actin in the** 263 **membrane protrusions.**

264 We evaluated the polymerization of actin in the protrusions of migrating B  
265 lymphocytes, finding a reduction of F-actin at the leading edge of the membrane in  
266 Myo1e<sup>-/-</sup> B cell (Fig S12A-B). The reduction was specific to this site because we did  
267 not find differences in total actin (Fig S13).

268 CARMIL (capping protein, Arp2/3, and Myosin-I linker) is a family of proteins  
269 involved in the migration of the cells. CARMIL was analyzed through colocalization  
270 assays (Fig S12C-D), and by co-immunoprecipitation (Fig S12E). Both strategies  
271 showed that Myo1e and CARMIL are associated at the leading edge of migrating B  
272 lymphocytes.

273 These results indicate that Myo1e participates in the remodeling of filamentous  
274 actin at the leading edge of migrating B lymphocytes.

275

### 276 **Myo1e deficiency affects cellular spreading; besides, it affects the activity of** 277 **RAC-1 and the phosphorylation of AKT.**

278 The Rho family of small GTPases are key regulators of the actin cytoskeleton and  
279 controlling the activity of numerous downstream effectors. Rac1, a member of the  
280 Rho family, together with AKT (a serine/threonine kinase) participate in actin  
281 reorganization required for the formation of protrusions during adhesion, spreading  
282 and motility of the cells. Thus, we evaluated the cellular spreading by measuring  
283 the curvature of the cell. If the ratio of semi-major ratio versus semi-minor axis  
284 (elliptical factor)  $> 2$ , this was indicative of a cell with polarized morphology. Most  
285 Myo1e<sup>-/-</sup> B cells had an elliptical factor less than two compared with wild type B  
286 lymphocytes (Fig. 6A-B).

287 The evaluation of RAC-1 in Myo1e-deficient B cells demonstrated a decrease in  
288 their activity of this GTPase (Fig. 6C-D). Similarly, the phosphorylation of  
289 Threonine 308 of AKT was reduced in Myo1e-deficient B lymphocytes (Fig. 6E-F).  
290 These results show the relevance of Myo1e in the activity of actin-related proteins  
291 such as GTPase RAC-1 and AKT (Niba et al., 2013, Zhu et al., 2015, Henderson et  
292 al., 2015).

293

### 294 **Myo1e participates in controlling the migration of B lymphocytes through the** 295 **signaling pathway of PI3K/AKT/RAC-1**

296 The regulation of AKT and Rac-1 is dependent on the activation of PI3K (lipid  
297 kinase that phosphorylated lipids). Both enzymes are needed for elongation of the  
298 membrane driven by F-actin at the leading edge. By using a PI3K inhibitor  
299 LY294002, we found a decrease in the elongation and reduced F-actin at the  
300 leading edge. The results strongly resemble those seen with Myo1e-deficient B  
301 cells (Fig. 7A-C). These results correlate with the reduction of FAK<sup>Y397</sup> and  
302 AKT<sup>Thr308</sup> phosphorylation and RAC-1 activity (Fig. 7D and Figure S14). As a  
303 whole, these results strongly suggest that Myo1e is critical for cell migration and  
304 integrins  
305 activation. The FAK/AKT/RAC-1 signaling pathway requires the participation of  
306 Myo1e.

307

308

309

310

311

312

313 **Discussion.**

314 Class I myosins have been involved in the regulation of adhesion, motility and the  
315 recycling of receptors through the transport of vesicles and by the interaction with  
316 different cytoskeletal proteins (Piedra-Quintero et al., 2019, López-Ortega and  
317 Santos-Argumedo, 2017, Maravillas-Montero et al., 2011). However, few works are  
318 analyzing how class I myosins participate in the signaling mechanism of in  
319 leukocytes during cell migration (Salvermoser et al., 2018, López-Ortega et al.,  
320 2016). In the present study, through intravital microscopy, we demonstrated the  
321 relevance of the Myo1e in the motility of activated B cells. The loss of Myo1e  
322 causes a reduction in B cell recruitment to the inguinal lymph nodes. This reduction  
323 is accompanied by a decrease in slow rolling, as well as adhesion in high  
324 endothelial venules (HEVs). Similar results have been reported in Myo1f-deficient  
325 neutrophils, causes a reduction in spreading, transmigrating and extravasation in  
326 cremasteric venules. This deficiency is due to an alteration in the morphology of  
327 the cell that prevents it from adhering correctly and allowing it to transmigrate  
328 through the tight junctions; however, the mechanism of action is not discussed in  
329 detail (Salvermoser et al., 2018). Additionally, other studies have shown the role of  
330 integrins in leukocyte migration; for example, a video-microscopy analysis in  
331 Peyer's patches, showed a reduction in the recruitment and the adhesion of  
332 lymphocytes when they were treated with neutralizing antibodies against LFA-1 or  
333 the  $\alpha 4$  subunit of integrins (Bargatze et al., 1995).

334 The reduction of recruitment of B cells to HEV was confirmed by homing assays,  
335 where it is observed that the loss of Myo1e causes a reduction of recruited B cells  
336 in the inguinal lymph node, concomitant with an accumulation of B cells in blood  
337 and spleen (Nolte et al., 2002, Ager, 2017). In our work we observed a reduction in  
338 the expression of integrins.

339 Of note, the role of Myo1e in the motility was only detected in activated B cells,  
340 since no significant differences were found in resting B cells. Activated B cells had  
341 reduced 2D migration, decreased adherence to fibronectin and hyaluronic acid;  
342 and diminished adherence to monolayers of bEnd.3 cells. Additionally, shorted  
343 membrane protrusions were found in Myo1e deficient B cells.

344 Migration is modulated by the expression of integrins; the cellular activation  
345 increased their expression (Chung et al., 2014) as well as chemokine receptors  
346 (Takabayashi et al., 2009, Goichberg et al., 2006), furthermore they are critical for  
347 the rearrangement of the cytoskeleton. Through different signaling pathways, these  
348 proteins contribute to the generation of membrane projections and as anchors to  
349 support the force needed for the motility. (Hood and Cheresch, 2002, Kritikou,  
350 2008). Our results have shown that the loss of Myo1e in B lymphocytes causes a  
351 decrease in the expression of LFA-1.

352 The formation of "integrin cluster," originates the autophosphorylation of FAK in  
353 Tyr<sup>397</sup> (Calalb et al., 1996) and allows the recruitment of paxillin (Hu et al., 2014)  
354 tensin (Qian et al., 2009), and talin (Nader et al., 2016), which are necessary to  
355 form a complex that stabilizes the adhesion. According to our results, FAK  
356 associates with Myo1e in B cells; this interaction had been reported in WM858  
357 melanoma cells (Heim et al., 2017) The interaction between FAK and Myo1e  
358 affects the autophosphorylation of FAK when CXCL12 stimulated the cells. Studies  
359 in DU-145 cells (human epithelial cells) and the hematopoietic precursors (HSC)  
360 demonstrated that CXCL12 modulates the phosphorylation of FAK and the  
361 expression of  $\beta 3$  and  $\alpha 5$  integrins, which then contributes to the adhesion mediated  
362 by VCAM-1 (Engl et al., 2006, Glodek et al., 2007). Therefore, we hypothesize that  
363 Myo1e is responsible for carrying FAK towards the integrin, this allows FAK  
364 autophosphorylation causing the formation of a complex, which is necessary for  
365 efficient cell adhesion and motility.

366 The membrane protrusions are important morphological structures for motility and  
367 protein localization (Tanaka et al., 2017, Xue et al., 2010). The interaction of  
368 Myo1e with the CARMIL protein is critical for the formation and elongation of the  
369 actin filaments (Liang et al., 2009).. In this work, we demonstrated the association

370 of CARMIL with Myo1e in B cells. This result suggests that Myo1e deficiency does  
371 not allow the recruitment of CARMIL causing the reduction of the membrane  
372 extensions.

373 The spreading is a mechanism used by the cell to maximize the contact area with  
374 different ligands. This is an essential step for slow rolling and then cellular  
375 transmigration. Deficiency in spreading has been described as a disturbance in the  
376 integrity of the cytoskeleton (Wakatsuki et al., 2003, Kim and Wirtz, 2013). In our  
377 work, we showed that Myo1e deficiency causes a reduction in spreading indicating  
378 that Myo1e is also involved in cell deformation.

379 RAC-1 is an essential small GTPase involved in the formation of actin filaments,  
380 spreading and cell motility. Its deficiency, in mouse embryonic fibroblasts (MEFs),  
381 has shown a reduction in the activity of RAC-1, altering cell morphology (Chang et  
382 al., 2011). This phenomenon has also been reported in the HeLa cell line, wherein  
383 the absence of RAP1, there is a decrease in the activity of Rac-1 affecting cell  
384 spreading and motility (Arthur et al., 2004)

385 The phosphorylation of AKT Thr<sup>308</sup> regulates the activity of Rac-1 through PDK1  
386 (Higuchi et al., 2008, Niba et al., 2013, Liu et al., 2018). There is an increase in the  
387 activity of RAC-1 and the phosphorylation of AKT by stimulation with growth  
388 factors, as in the cell line MDA-MB-231 (mammary gland epithelial cells) treated  
389 with epidermal growth factor (EGF) (Yang et al., 2011). Our results show a  
390 decrease in the spreading of activated Myo1e<sup>-/-</sup> B lymphocytes that correlates with  
391 reduced activity of RAC-1 and reduced phosphorylation of AKT<sup>Thr308</sup>. FAK through  
392 its kinase activity allows the phosphorylation of PI3K. PI3K is an enzyme involved  
393 in the conversion of phosphatidylinositol 4,5, bisphosphate (PIP2) to  
394 phosphatidylinositol 3,4,5 triphosphate (PIP3) in the membrane (Agelaki et al.,  
395 2007, Matsuoka et al., 2012) PIP3 allows the anchorage of AKT to the membrane  
396 and promote the activity of RAC-1. The inhibition the activity of the FAK/PI3K/RAC-  
397 1 pathway, in the EA.hy926 cell line (human endothelial cells) and the MCF7 cell  
398 line (human epithelial cells) decreases cell migration (Kallergi et al., 2007, Huang  
399 et al., 2013). We found that in the absence of Myo1e, activated B cells stimulated  
400 with CXCL12 show a similar phenotype than wild type B cells inhibited by

401 Ly294002 (a PI3K inhibitor). These results were corroborated with the reduction in  
402 the phosphorylation of FAK, AKT and the activity of RAC-1. As a whole, these  
403 results indicated that Myo1e is involved in the FAK/PI3K/RAC-1 signaling pathway.  
404 In conclusion, we have presented evidence that Myo1e is critical for the  
405 recruitment and adhesion of B cells to the inguinal lymph node through the  
406 localization of integrins and this phenomenon is modulated by the FAK/PI3K/RAC1  
407 signaling pathway.

## 408 **Materials and methods**

### 409 **Mice and reagents. –**

410 We use female C57BL/6J or B6.129S6(Cg)-*Myo1e*<sup>tm1.1Flv</sup>/J (8–10 weeks; in all  
411 experiments). The mice were kindly provided by Dr. Richard Flavell (Yale School of  
412 Medicine, USA) and then bred and maintained in the animal facility at the “Centro  
413 de Investigación y de Estudios Avanzados” (Mexico City, Mexico) animal facility.  
414 The Animal Care and Use Committee of “Centro de Investigación y de Estudios  
415 Avanzados” approved all experiments.

416 All mice were allowed free access to water and a maintenance diet containing 20%  
417 protein (PicoLab® mouse diet 20, LabDiet® 5058, St. Louis, MO, USA) in a 12-  
418 hour light/dark cycle, with room temperature at 22 ± 2°C and humidity at 50 ± 10%.  
419 All cages contained Aspen chip and Aspen Shaving (50/50%) (NEPCO®  
420 Warrensburg, NY, USA) as bedding, moreover, included wood shavings, bedding  
421 and a cardboard tube for environmental enrichment.

### 422 **Lymphocyte isolation and flow cytometry. –**

423 Splenic mononuclear cells were isolated by Ficoll-paque Plus (GE Healthcare)  
424 (Little Chalfont, United Kingdom) density gradient separation, and then B220<sup>+</sup> cells  
425 were enriched by panning, using plastic dishes coated with α-Thy-1 mAb ascites  
426 (NIM-R1) (Chayen and Parkhouse, 1982).

427 For activation, 2x10<sup>6</sup> B cells were incubated in 1 ml 10% fetal bovine serum (FBS)  
428 (Thermo Fischer, Scientific) (Waltham, MA, USA) supplemented RPMI 1640 (Life  
429 Technologies) (Grand Island, NY, USA) containing LPS from *Escherichia coli*

430 O55:B5 at 40 mg/ml (Sigma Chemical Co, St) (Louis, MO, USA) plus 10 U/ml IL-4  
431 (R&D Systems) (Minneapolis, MN, USA) for 48 h at 37 °C and 5% CO<sub>2</sub>.

432 For immunostaining, we blocked the Fc receptors using 10% goat serum; the cell  
433 suspensions were immediately washed with PBS containing 1% BSA and 0.01%  
434 NaN<sub>3</sub> (PBA). Depending on each experiment, one million cells were stained for 15  
435 minutes using the antibodies described in the following section. After incubation,  
436 the cells were washed with PBA and were fixed with 1% Formaldehyde in PBS  
437 (0.5% Albumin, 0.01% Sodium azide, 100 ml PBS). The doublets were excluded  
438 with the gating on FSC-H vs. FSC-A, and the lymphocytes were identified by their  
439 scatter properties (FSC-A vs. SSC.A). The compensation was performed using  
440 single-stained cells for each of the fluorochromes used. The cells were evaluated  
441 using “BD LSRFortessa” flow cytometer (Becton-Dickinson) (San Jose, CA), and  
442 analyzed using FlowJo v.10 software (Tree Star, Inc.) (Ashland, Oregon). All the  
443 experiments were performed according to the flow cytometry guide-lines  
444 (Cossarizza et al., 2017).

#### 445 **Antibodies and reagents. -**

446 The antibodies used were: anti-B220-BV421 (clone RA3-6B2, BioLegend) (San  
447 Diego, California, USA), anti-B220/CD45R (clone RA3-6B2, BioLegend), anti-CD19  
448 (Southern Biotechnology Associates) (Birmingham, Alabama, USA), anti-CD29  
449 (clone hm B1-1, BioLegend), anti-LFA-1 (clone HI1111, BioLegend), anti-CD62L  
450 (clone DREG-56, BioLegend), anti-TLR-4 (clone TF901, BioLegend), anti-CXCR4  
451 (clone 2G8, BioLegend), anti-CD44 (clone IM7, BioLegend), anti-Myo1e (clone  
452 PAD434 Cloud Corp) (Katy, TX, USA), anti-CARMIL (clone E-10, Santa Cruz,  
453 Biotechnology) (Dallas, TX, USA), anti-WASp (Clone EP2541, Abcam)  
454 (Cambridge, UK) anti-RAC-1 (clone B-8, Santa Cruz, Biotechnology), anti-RAC-1  
455 GTP (clone 26903, ser-61, Biomol) (Hamburg, Germany), anti-PI3K (clone sc-  
456 1637, Santa Cruz, Biotechnology) anti-AKT (clone sc-5298, Santa Cruz,  
457 Biotechnology), anti-phospho-AKT (clone sc-271966, Santa Cruz, Biotechnology).  
458 Other reagents included, TRITC-Phalloidin (Thermo Fischer, Scientific), Hoescht

459 33342 (Thermo Fischer, Scientific), Ly294002 (Sigma Aldrich), The murine  
460 CXCL12 was purchased from PeproTech (Rocky Hill, NJ, USA).

#### 461 **Immunofluorescence microscopy.**

462 Cells were fixed 20 minutes with paraformaldehyde at 4%. After washing, the cells  
463 were permeabilized 30 minutes with Triton X-100 (0.1%). Then, the Fc receptors  
464 were blocked with goat serum to avoid nonspecific binding. Immunolabeling with  
465 primary antibodies was performed by 30 minutes incubation at 4 C, followed by  
466 washing and incubation with species-specific fluorescence-labeled secondary  
467 antibodies or TRITC-phalloidin (Thermo Fischer, Scientific). The preparations were  
468 mounted with Vecta-shield (Cat. H-1000 Vector labs) (Burlingame, CA, USA). The  
469 slides were analyzed in confocal microscopy (Leica Microscopy, TCS SPE, Model  
470 DMI4000) (Wetzlar, Germany). Quantification of intensity fluorescence was  
471 performed using the program LAS AS lite 5.0 (Leica Microscopy).

#### 472 **Homing assays.**

473 B cells purified from spleen from Myo1e<sup>+/+</sup> or Myo1e<sup>-/-</sup> mice were labeled with 0.1  
474  $\mu$ m or 0.6  $\mu$ m of Carboxyfluorescein succinimidyl ester (CFSE) (Thermo Fischer,  
475 Scientific), respectively, or vice versa, in a complementary set of experiments. The  
476 cells were mixed at different ratios: 25%, 50% or 75% Myo1e<sup>+/+</sup> B cells with the  
477 respective percentage of Myo1e<sup>-/-</sup> B cells to complete 100%. The mixed  
478 suspensions of  $1 \times 10^7$  B cells were injected via the tail vein. One-hour previously,  
479 the right inguinal lymph node of a host wild type mice was inoculated with CXCL12  
480 (25 ng/ml), while the left inguinal lymph node was inoculated with PBS. The host  
481 mice were sacrificed 2 hours after inoculation. The blood, the spleen, and the  
482 inguinal lymph nodes were extracted. After that, the cells were recovered and  
483 measured using "BD LSRFortessa" flow cytometer (Becton-Dickinson) (San Jose,  
484 CA, USA), and analyzed using FlowJo v10 software (Tree Star, Inc.) (Ashland,  
485 Oregon, USA). For intravital microscopy, both inguinal lymph nodes were extracted  
486 to quantify the numbers of cells.

#### 487 **In vitro chemotaxis assays.**



488 For quantification of migration, a Zigmond chamber (Neuroprobe) (Gaithersburg,  
489 MD, USA) was used. Briefly, one million of activated B lymphocytes from Myo1e<sup>+/+</sup>  
490 and Myo1e<sup>-/-</sup> mice, were suspended in 0.5 mL of 10% FBS supplemented RPMI  
491 1640 (Life Technologies) and immediately plated onto glass coverslips, previously  
492 coated with fibronectin (2.5 µg/mL) (Sigma-Aldrich), that were incubated for 30 min  
493 at 37°C and 5% CO<sub>2</sub>, to allow the cells to attach. The coverslips, with the cells  
494 attached, were gently washed with PBS, One of the grooves in the Zigmond  
495 chamber was filled with supplemented medium (approximately 70 µL), and the  
496 other groove was then filled with CXCL12 (2.5 µg/uL) (PrepoTech) also dissolved  
497 in a supplemented medium. A baseline image was obtained at 10x magnification,  
498 and digital images of the cells were taken every 30s for 1h maintaining the  
499 temperature of the room between 35 and 39°C. For analyzing the trajectories and  
500 speed of migration, the migration tracks were traced for at least 100 lymphocytes  
501 of Myo1e<sup>+/+</sup> and Myo1e<sup>-/-</sup>, in five independent experiments, using the NIH ImageJ  
502 software with chemotaxis and migration tool 2.0 (Ibidi, Martinsried, Munich,  
503 Germany) (Gorelik and Gautreau, 2014).

#### 504 **Adhesion assays.**

505 Polystyrene plates with 96 wells (Nalge Nunc International) (Penfield, NY, USA)  
506 were coated with Hyaluronic acid (2.5 mg/ml) (Sigma-Aldrich), fibronectin (2.5  
507 mg/ml) (Sigma-Aldrich) or poly-lysine (0.01%) (Sigma-Aldrich), 1 hour at 37 C.  
508 After incubation, the plates were washed twice with PBS before adding 4 × 10<sup>5</sup>  
509 panning-enriched B cells in 200 µl of RPMI 1640 per well. The cells adhered for  
510 one h at 37°C and then, the plates were washed with PBS. The cells were fixed 10  
511 min with 4% paraformaldehyde, before adding crystal-violet (7.5 g/l crystal-violet,  
512 2.5 g/l NaCl, 1.57% formaldehyde, 50% methanol) for an additional 5 minutes.  
513 After that, the plates were solubilized with 10% SDS, and the amount the  
514 remaining dye in the plates was registered at 540 nm (Multiskan Ascent) (Thermo  
515 Fischer Scientific). Non-specific dye bound to empty wells was subtracted, and the  
516 absolute binding was calculated. The absorbance was determined in four wells per  
517 condition.

518 **Western Blot.**

519 B cells were lysed with RIPA buffer (20 mM Tris–HCl (pH 7.5), 150 mM NaCl, 1  
520 mM, EDTA, 1 mM EGTA, 1% Triton X-100, 1 µg/ml leupeptin, 10 µg/ml aprotinin,  
521 and 1 mM PMSF) 30 min at 4°C. The protein content was determinate with the  
522 Modified Lowry Protein Assay Kit (Thermo Fischer, Scientific). Proteins were  
523 separated via 12% SDS-PAGE at 85 V, and 50 µg of protein was added from each  
524 sample to independent wells in the gel. After electrophoresis separation, the  
525 proteins were transferred to a nitrocellulose membrane (BIO-RAD) (Hercules, CA,  
526 USA) at 120 V, 1.5 hours. After transference, the membranes were blocked 30  
527 minutes with albumin serum bovine (BSA) (5%) (Thermo Fischer, Scientific) After  
528 blocking; the membranes were incubated one hour at 37 °C with specific  
529 antibodies. After washing with TBS-Tween 20 (0.01%) (Sigma Aldrich), the  
530 membranes were incubated with the respective secondary HRP-labeled antibody.  
531 Finally, the blots were revealed with Western Blotting Chemiluminescence Luminol  
532 Reagent (Santa Cruz, Biotechnology). Tubulin or actin was used as loading  
533 controls.

534 **Intravital Microscopy.**

535 Myo1e<sup>+/+</sup> host mouse was anesthetized by intraperitoneal injection of 12.5 mg/kg  
536 xylazine and 125 mg/kg ketamine hydrochloride (Sanofi, Mexico-City, Mexico).  
537 Then, the inguinal lymph node of the was inoculated with CXCL12 (25 ng/ml)  
538 (PeproTech). One hour later, 1x10<sup>7</sup> Hoestch 333462 labeled B cells were directly  
539 injected via the carotid artery. The venules of the inguinal lymph node were  
540 recorded using the an intravital upright microscope (Axioscope, Model A1, Zeiss),  
541 (Oberkochen, Baden-Württemberg, Germany) with a 40 x and 0.75 saline  
542 immersion objective (Zeiss, Microscopy) (Oberkochen, Baden-Württemberg,  
543 Germany) Videos and images were analyzed using ImageJ (NIH, Bethesda, MD.  
544 USA) and Zen Blue Edition 2.5 software (Zeiss, Microscopy). The diameter of the  
545 venules, the number of adherent cells, the number of transmigrated cells and the  
546 velocity of the cells were measured with ImageJ. The cells flux, the blood flux, the

547 slow rolling and the rolling were analyzed by Zen Blue Edition 2.5 software (Zeiss,  
548 Microscopy).

#### 549 **Pharmacological inhibition treatment.** -

550 Ten million activated B cells treated (2 h) with 20  $\mu$ M LY294002 (Sigma Aldrich),  
551 were stimulated with CXCL12 (PeproTech) in RPMI-1640, supplemented with 5%  
552 fetal bovine serum or only supplemented medium. After blockage and stimulation,  
553 the cells were used in different experiments as indicated.

#### 554 **Co-Immunoprecipitation assay**

555 Protein extracts (500  $\mu$ g) of resting or activated B cells were used, the lysates were  
556 centrifuged 18,000 g, 30 min at 4°C. The supernatants were mixed with anti-  
557 Myo1e, anti-Focal adhesion kinase (FAK) or anti-CARMIL, using rabbit IgG or rat  
558 IgG, as isotype controls, respectively. The supernatants were incubated overnight  
559 at 4°C in agitation; then, the complexes were precipitated with protein G-agarose  
560 (Life Technologies), maintaining the temperature at 4°C. Complexes were washed  
561 three times with RIPA buffer and boiled in Laemmli buffer. SDS-PAGE and western  
562 blotting was performed as previously indicated.

563

#### 564 **Statistical analysis.**

565 Data are presented as the arithmetic mean with standard deviations; the *t* Student  
566 test was used for evaluating statistical differences. A p-value of <0.05 was  
567 considered statically significant. The p values are represented as \*p<0.05, \*\*  
568 p<0.01 and \*\*\*p<0.001 and the number of samples or cells (n) used are mentioned  
569 in each figure legend.

#### 570 **Acknowledgments.**

571 D.AG-P. designed and performed the experiments; and wrote the paper. E-V  
572 designed and performed intravital experiments, M-S designed the experiments,  
573 supervised the work, LS-A designed the experiments, supervised the work, and  
574 wrote the paper.

575 The authors thank Dr. Richard Flavell, for the kind donation of the Myo1e<sup>-/-</sup> mice;  
576 Dr. Santiago Partida-Sanchez for his help to reinitiate our colony of mice; Dr.  
577 Hector Romero-Ramirez, Mr. Lenin Estudillo, and M.Sc. Itze Cecilia Navarro  
578 Hernandez for their support; and, MVZ Ricardo Gaxiola-Centeno for taking care of  
579 the mice

#### 580 **Competing interests.**

581 The authors declare no competing financial, not interests commercial or  
582 financial conflict of interest.

#### 583 **Funding.**

584 This work was supported by a grant from Consejo Nacional de Ciencia y  
585 Tecnologia (CONACYT) (No. 255053).. Daniel Alberto Girón-Pérez received a  
586 scholarship from CONACYT to perform Doctorate studies (305392).

587

#### 588 **References**

- 589 Agelaki, S., Kallergi, G., Markomanolaki, C., Georgoulas, V. & Stournaras, C.  
590 (2007). FAK/PI3K activation controls actin reorganization and cell motility  
591 *Cancer Research*, 67, 3035-3035.
- 592 Ager, A. (2017). High Endothelial Venules and Other Blood Vessels: Critical  
593 Regulators of Lymphoid Organ Development and Function. *Frontiers in*  
594 *immunology*, 8, 45-45.
- 595 Anderson, A. O. & Anderson, N. D. (1976). Lymphocyte emigration from high  
596 endothelial venules in rat lymph nodes. *Immunology*, 31, 731-748.
- 597 Arthur, W. T., Quilliam, L. A. & Cooper, J. A. (2004). Rap1 promotes cell spreading  
598 by localizing Rac guanine nucleotide exchange factors. *The Journal of Cell*  
599 *Biology*, 167, 111-122.
- 600 Bargatze, R. F., Jutila, M. A. & Butcher, E. C. (1995). Distinct roles of L-selectin  
601 and integrins  $\alpha 4\beta 7$  and LFA-1 in lymphocyte homing to Peyer's patch-HEV  
602 in situ: The multistep model confirmed and refined. *Immunity*, 3, 99-108.

- 603 Calalb, M. B., Zhang, X., Polte, T. R. & Hanks, S. K. (1996). Focal Adhesion  
604 Kinase Tyrosine-861 Is a Major Site of Phosphorylation by Src. *Biochemical  
605 and Biophysical Research Communications*, 228, 662-668.
- 606 Cossarizza, A., *et al.* (2017). Guidelines for the use of flow cytometry and cell  
607 sorting in immunological studies. *European Journal of Immunology*, 47,  
608 1584-1797.
- 609 Chang, F., Lemmon, C., Lietha, D., Eck, M. & Romer, L. 2011. Tyrosine  
610 phosphorylation of Rac1: a role in regulation of cell spreading. *PloS one*, 6,  
611 e28587-e28587.
- 612 Chayen, A. & Parkhouse, R. M. E. (1982). Preparation and properties of a cytotoxic  
613 monoclonal rat anti-mouse Thy-1 antibody. *Journal of Immunological  
614 Methods*, 49, 17-23.
- 615 Chuluyan, H. E. & Issekutz, A. C. (1993). VLA-4 integrin can mediate CD11/CD18-  
616 independent transendothelial migration of human monocytes. *The Journal of  
617 clinical investigation*, 92, 2768-2777.
- 618 Chung, K.-J., Mitroulis, I., Wiessner, J. R., Zheng, Y. Y., Siegert, G., Sperandio, M.  
619 & Chavakis, T. (2014). A novel pathway of rapid TLR-triggered activation of  
620 integrin-dependent leukocyte adhesion that requires Rap1 GTPase.  
621 *Molecular biology of the cell*, 25, 2948-2955.
- 622 De Pascalis, C. & Etienne-Manneville, S. (2017). Single and collective cell  
623 migration: the mechanics of adhesions. *Molecular biology of the cell*, 28,  
624 1833-1846.
- 625 Doyle, A. D., Carvajal, N., Jin, A., Matsumoto, K. & Yamada, K. M. (2015). Local  
626 3D matrix microenvironment regulates cell migration through spatiotemporal  
627 dynamics of contractility-dependent adhesions. *Nature Communications*, 6,  
628 8720.
- 629 Engl, T., Relja, B., Marian, D., Blumenberg, C., Müller, I., Beecken, W.-D., Jones,  
630 J., Ringel, E. M., Bereiter-Hahn, J., Jonas, D. & Blaheta, R. A. (2006).  
631 CXCR4 chemokine receptor mediates prostate tumor cell adhesion through  
632 alpha5 and beta3 integrins. *Neoplasia (New York, N.Y.)*, 8, 290-301.

- 633 Francois, J., Meili, R., Del Alamo, J. C., Firtel, R. A. & Lasheras, J. C. (2016).  
634 Mechanics of Adhesion Dependent and Independent Neutrophil Migration in  
635 Three-Dimensional Extra-Cellular Matrices. *Biophysical Journal*, 110, 512a.
- 636 Gerberick, G. F., Cruse, L. W., Miller, C. M., Sikorski, E. E. & Ridder, G. M. (1997).  
637 Selective Modulation of T Cell Memory Markers CD62L and CD44 on  
638 Murine Draining Lymph Node Cells Following Allergen and Irritant  
639 Treatment. *Toxicology and Applied Pharmacology*, 146, 1-10.
- 640 Girard, J.-P., Moussion, C. & Förster, R. (2012). HEVs, lymphatics and  
641 homeostatic immune cell trafficking in lymph nodes. *Nature Reviews*  
642 *Immunology*, 12, 762.
- 643 Glodek, A., Le, Y., Dykxhoorn, D. M., Park, S., Mostoslavsky, G., Mulligan, R.,  
644 Lieberman, J., Beggs, H., Honczarenko, M. & Silberstein, L. (2007). Focal  
645 adhesion kinase is required for CXCL12-induced chemotactic and pro-  
646 adhesive responses in hematopoietic precursor cells. *Leukemia*, 21, 1723.
- 647 Goichberg, P., Kalinkovich, A., Borodovsky, N., Tesio, M., Petit, I., Nagler, A.,  
648 Hardan, I. & Lapidot, T. (2006). cAMP-induced PKC $\zeta$  activation increases  
649 functional CXCR4 expression on human CD34<sup>+</sup> hematopoietic progenitors.  
650 *Blood*, 107, 870-879.
- 651 Gorelik, R. & Gautreau, A. (2014). Quantitative and unbiased analysis of directional  
652 persistence in cell migration. *Nature Protocols*, 9, 1931.
- 653 Heim, J. B., Squirewell, E. J., Neu, A., Zocher, G., Sominidi-Damodaran, S., Wyles,  
654 S. P., Nikolova, E., Behrendt, N. (2017). Myosin-1E interacts with FAK  
655 proline-rich region 1 to induce fibronectin-type matrix. *Proceedings of the*  
656 *National Academy of Sciences*, 114, 3933-3938.
- 657 Henderson, V., Smith, B., Burton, L. J., Randle, D., Morris, M. & Odero-Marah, V.  
658 A. (2015). Snail promotes cell migration through PI3K/AKT-dependent Rac1  
659 activation as well as PI3K/AKT-independent pathways during prostate  
660 cancer progression. *Cell adhesion & migration*, 9, 255-264.
- 661 Higuchi, M., Onishi, K., Kikuchi, C. & Gotoh, Y. (2008). Scaffolding function of PAK  
662 in the PDK1–Akt pathway. *Nature Cell Biology*, 10, 1356.

- 663 Hood, J. D. & Cheresch, D. A. (2002). Role of integrins in cell invasion and  
664 migration. *Nature Reviews Cancer*, 2, 91.
- 665 Hu, Y.-L., Lu, S., Szeto, K. W., Sun, J., Wang, Y., Lasheras, J. C. & Chien, S.  
666 (2014). FAK and paxillin dynamics at focal adhesions in the protrusions of  
667 migrating cells. *Scientific Reports*, 4, 6024.
- 668 Huang, X., Shen, Y., Zhang, Y., Wei, L., Lai, Y., Wu, J., Liu, X. & Liu, X. (2013).  
669 Rac1 mediates laminar shear stress-induced vascular endothelial cell  
670 migration. *Cell adhesion & migration*, 7, 462-468.
- 671 Kallergi, G., Agelaki, S., Markomanolaki, H., Georgoulas, V. & Stournaras, C.  
672 (2007). Activation of FAK/PI3K/Rac1 Signaling Controls Actin  
673 Reorganization and Inhibits Cell Motility in Human Cancer Cells. *Cellular  
674 Physiology and Biochemistry*, 20, 977-986.
- 675 Kansas, G. S., Ley, K., Munro, J. M. & Tedder, T. F. (1993). Regulation of  
676 leukocyte rolling and adhesion to high endothelial venules through the  
677 cytoplasmic domain of L-selectin. *The Journal of experimental medicine*,  
678 177, 833-838.
- 679 Kim, D.-H. & Wirtz, D. (2013). Predicting how cells spread and migrate: focal  
680 adhesion size does matter. *Cell adhesion & migration*, 7, 293-296.
- 681 Kim, S. V., Mehal, W. Z., Dong, X., Heinrich, V., Pypaert, M., Mellman, I., Dembo,  
682 M., Mooseker, M. S., Wu, D. & Flavell, R. A. (2006). Modulation of Cell  
683 Adhesion and Motility in the Immune System by Myo1f. *Science*, 314, 136-  
684 139.
- 685 Kritikou, E. (2008). Recycling integrins. *Nature Reviews Molecular Cell Biology*, 9,  
686 826.
- 687 Liang, Y., Niederstrasser, H., Edwards, M., Jackson, C. E. & Cooper, J. A. (2009).  
688 Distinct roles for CARMIL isoforms in cell migration. *Molecular biology of the  
689 cell*, 20, 5290-5305.
- 690 Liu, Y., Dhall, S., Castro, A., Chan, A., Alamat, R. & Martins-Green, M. (2018).  
691 Insulin regulates multiple signaling pathways leading to  
692 monocyte/macrophage chemotaxis into the wound tissue. *Biology Open*, 7,  
693 026-187.

- 694 López-Ortega, O., Ovalle-García, E., Ortega-Blake, I., Antillón, A., Chávez-  
695 Munguía, B., Patiño-López, G., Fragoso-Soriano, R. & Santos-Argumedo, L.  
696 (2016). Myo1g is an active player in maintaining cell stiffness in B-  
697 lymphocytes. *Cytoskeleton*, 73, 258-268.
- 698 López-Ortega, O. & Santos-Argumedo, L. (2017). Myosin 1g Contributes to CD44  
699 Adhesion Protein and Lipid Rafts Recycling and Controls CD44 Capping  
700 and Cell Migration in B Lymphocytes. *Frontiers in immunology*, 8, 1731-  
701 1731.
- 702 Manevich, E., Grabovsky, V., Feigelson, S. W. & Alon, R. (2007). Talin 1 and  
703 Paxillin Facilitate Distinct Steps in Rapid VLA-4-mediated Adhesion  
704 Strengthening to Vascular Cell Adhesion Molecule 1. *Journal of Biological  
705 Chemistry*, 282, 25338-25348.
- 706 Maravillas-Montero, J. L., Gillespie, P. G., Patiño-López, G., Shaw, S. & Santos-  
707 Argumedo, L. (2011). Myosin 1c Participates in B Cell Cytoskeleton  
708 Rearrangements, Is Recruited to the Immunologic Synapse, and  
709 Contributes to Antigen Presentation. *The Journal of Immunology*, 187, 3053-  
710 3063.
- 711 Matsuoka, T., Yashiro, M., Nishioka, N., Hirakawa, K., Olden, K. & Roberts, J. D.  
712 (2012). PI3K/Akt signalling is required for the attachment and spreading,  
713 and growth in vivo of metastatic scirrhous gastric carcinoma. *British Journal  
714 Of Cancer*, 106, 1535.
- 715 Mayor, R. & Etienne-Manneville, S. (2016). The front and rear of collective cell  
716 migration. *Nature Reviews Molecular Cell Biology*, 17, 97.
- 717 Mesin, L., Ersching, J. & Vitoria, Gabriel d. (2016). Germinal Center B Cell  
718 Dynamics. *Immunity*, 45, 471-482.
- 719 Mionnet, C., Sanos, S. L., Mondor, I., Jorquera, A., Laugier, J.-P., Germain, R. N.  
720 & Bajénoff, M. (2011). High endothelial venules as traffic control points  
721 maintaining lymphocyte population homeostasis in lymph nodes. *Blood*,  
722 118, 6115-6122.
- 723 Mitchison, T. & Cramer, L. (1996). Actin-based cell motility and cell locomotion.  
724 *Cell*, 84, 371-379.



- 725 Nader, G. P. F., Ezratty, E. J. & Gundersen, G. G. (2016). FAK, talin and PIPKly  
726 regulate endocytosed integrin activation to polarize focal adhesion  
727 assembly. *Nature Cell Biology*, 18, 491.
- 728 Niba, E. T. E., Nagaya, H., Kanno, T., Tsuchiya, A., Gotoh, A., Tabata, C.,  
729 Kuribayashi, K., Nakano, T. & Nishizaki, T. (2013). Crosstalk between PI3  
730 Kinase/PDK1/Akt/Rac1 and Ras/Raf/MEK/ERK Pathways Downstream  
731 PDGF Receptor. *Cellular Physiology and Biochemistry*, 31, 905-913.
- 732 Nolte, M. A., Hamann, A., Kraal, G. & Mebius, R. E. (2002). The strict regulation of  
733 lymphocyte migration to splenic white pulp does not involve common  
734 homing receptors. *Immunology*, 106, 299-307.
- 735 Okada, T. & Cyster, J. G. (2006). B cell migration and interactions in the early  
736 phase of antibody responses. *Current Opinion in Immunology*, 18, 278-285.
- 737 Osherov, N. & May, G. S. (2000). In vivo function of class I myosins. *Cell motility  
738 and the cytoskeleton*, 47, 163-173.
- 739 Paul, P., Van den hoorn, T., Jongsma, Marlieke I. M., Bakker, Mark j., Hengeveld,  
740 R., Janssen, L., Cresswell, P. (2011). A Genome-wide Multidimensional  
741 RNAi Screen Reveals Pathways Controlling MHC Class II Antigen  
742 Presentation. *Cell*, 145, 268-283.
- 743 Pereira, J. P., Kelly, L. M. & Cyster, J. G. (2010). Finding the right niche: B-cell  
744 migration in the early phases of T-dependent antibody responses.  
745 *International immunology*, 22, 413-419.
- 746 Piedra-Quintero, Z. L., Serrano, C., Villegas-Sepúlveda, N., Maravillas-Montero, J.  
747 L., Romero-Ramírez, S., Shibayama, M., Medina-Contreras, O., Nava, P. &  
748 Santos-Argumedo, L. (2019). Myosin 1F Regulates M1-Polarization by  
749 Stimulating Intercellular Adhesion in Macrophages. *Frontiers in Immunology*,  
750 9.
- 751 Qian, X., Li, G., Vass, W. C., Papageorge, A., Walker, R. C., Asnaghi, L.,  
752 Steinbach, P. J., Tosato, G., Hunter, K. & Lowy, D. R. (2009). The Tensin-3  
753 protein, including its SH2 domain, is phosphorylated by Src and contributes  
754 to tumorigenesis and metastasis. *Cancer cell*, 16, 246-258.

- 755 Sales, A., Ende, K., Diemer, J., Kyvik, A. R., Veciana, J., Ratera, I., Kemkemer, R.,  
756 Spatz, J. P. & Guasch, J. (2019). Cell Type-Dependent Integrin Distribution  
757 in Adhesion and Migration Responses on Protein-Coated Microgrooved  
758 Substrates. *ACS Omega*, 4, 1791-1800.
- 759 Salvermoser, M., Pick, R., Weckbach, L. T., Zehrer, A., Löhr, P., Drechsler, M.,  
760 Sperandio, M., Soehnlein, O. & Walzog, B. (2018). Myosin 1f is specifically  
761 required for neutrophil migration in 3D environments during acute  
762 inflammation. *Blood*, 131, 1887-1898.
- 763 Santos-Argumedo, L., Kincade, P. W., Partida-Sánchez, S. & Parkhouse, R. M.  
764 (1997). CD44-stimulated dendrite formation ('spreading') in activated B cells.  
765 *Immunology*, 90, 147-153.
- 766 Santos-Argumedo, L., Maravillas-Montero, J. L. & López-Ortega, O. (2013). Class I  
767 myosins in B-cell physiology: functions in spreading, immune synapses,  
768 motility, and vesicular traffic. *Immunological Reviews*, 256, 190-202.
- 769 Sellers, J. R. (2000). Myosins: a diverse superfamily. *Biochimica et Biophysica*  
770 *Acta (BBA) - Molecular Cell Research*, 1496, 3-22.
- 771 Senbanjo, L. T. & Chellaiah, M. A. (2017). CD44: A Multifunctional Cell Surface  
772 Adhesion Receptor Is a Regulator of Progression and Metastasis of Cancer  
773 Cells. *Frontiers in cell and developmental biology*, 5, 18-18.
- 774 Smith, A., Bracke, M., Leitinger, B., Porter, J. C. & Hogg, N. (2003). LFA-1-induced  
775 T cell migration on ICAM-1 involves regulation of MLCK-mediated  
776 attachment and ROCK-dependent detachment. *Journal of Cell Science*,  
777 116, 3123-3133.
- 778 Takabayashi, T., Takahashi, N., Okamoto, M., Yagi, H., Sato, M. & Fujieda, S.  
779 (2009). Lipopolysaccharides increase the amount of CXCR4, and modulate  
780 the morphology and invasive activity of oral cancer cells in a CXCL12-  
781 dependent manner. *Oral Oncology*, 45, 968-973.
- 782 Tanaka, M., Kikuchi, T., Uno, H., Okita, K., Kitanishi-Yumura, T. & Yumura, S.  
783 (2017). Turnover and flow of the cell membrane for cell migration. *Scientific*  
784 *reports*, 7, 12970-12970.

- 785 Tanimura, S., Hashizume, J., Arichika, N., Watanabe, K., Ohyama, K., Takeda, K.  
786 & Kohno, M. (2016). ERK signaling promotes cell motility by inducing the  
787 localization of myosin 1E to lamellipodial tips. *The Journal of Cell Biology*,  
788 214, 475-489.
- 789 Thompson, R. F. & Langford, G. M. (2002). Myosin superfamily evolutionary  
790 history. *The Anatomical Record*, 268, 276-289.
- 791 Vicente-Manzanares, M., Webb, D. J. & Horwitz, A. R. (2005). Cell migration at a  
792 glance. *Journal of Cell Science*, 118, 4917-4919.
- 793 Von Andrian, U. H. (1996). Intravital Microscopy of the Peripheral Lymph Node  
794 Microcirculation in Mice. *Microcirculation*, 3, 287-300.
- 795 Wakatsuki, T., Wysolmerski, R. B. & Elson, E. L. (2003). Mechanics of cell  
796 spreading: role of myosin II. *Journal of Cell Science*, 116, 1617-1625.
- 797 Walling, B. L. & Kim, M. (2018). LFA-1 in T Cell Migration and Differentiation.  
798 *Frontiers in immunology*, 9, 952-952.
- 799 Weninger, W., Ulfman, L. H., Cheng, G., Souchkova, N., Quackenbush, E. J.,  
800 Lowe, J. B. & Von Andrian, U. H. (2000). Specialized Contributions by  
801  $\alpha(1,3)$ -Fucosyltransferase-IV and FucT-VII during Leukocyte Rolling in  
802 Dermal Microvessels. *Immunity*, 12, 665-676.
- 803 Wenzel, J., Ouderkirk, J. L., Krendel, M. & Lang, R. (2015). The class I myosin  
804 Myo1e regulates TLR4-triggered macrophage spreading, chemokine  
805 release and antigen presentation via MHC class II. *European journal of*  
806 *immunology*, 45, 225-237.
- 807 Xue, F., Janzen, D. M. & Knecht, D. A. (2010). Contribution of filopodia to cell  
808 migration: a mechanical link between protrusion and contraction.  
809 *International journal of cell biology*, 2010.
- 810 Yang, Y., Du, J., Hu, Z., Liu, J., Tian, Y., Zhu, Y., Wang, L. & Gu, L. (2011).  
811 Activation of Rac1-PI3K/Akt is required for epidermal growth factor-induced  
812 PAK1 activation and cell migration in MDA-MB-231 breast cancer cells.  
813 *Journal of biomedical research*, 25, 237-245.
- 814 Zhu, G., Fan, Z., Ding, M., Zhang, H., Mu, L., Ding, Y., Zhang, Y., Jia, B., Chen, L.,  
815 Chang, Z. & Wu, W. (2015). An EGFR/PI3K/AKT axis promotes

816 accumulation of the Rac1-GEF Tiam1 that is critical in EGFR-driven  
817 tumorigenesis. *Oncogene*, 34, 5971.

818

819

820

821

822

823

824

825

826

827

828

829

830

831

832

833

834

835 **Figure legends.**

836 **Fig 1. Myo1e is required for recruitment and adhesion of B cells to the**  
837 **inguinal lymph node.**

838 A) Representative images of intravital microscopy of activated B cells (stained with  
839 Hoescht 33342) from Myo1e<sup>+/+</sup> and Myo1e<sup>-/-</sup> mice in the venules of an inguinal

840 lymph node of a host Myo1e<sup>+/+</sup> mice. Images were registered (40x objective) at  
841 different time points (0, 30 and 45 minutes) in the venules of an inguinal lymph  
842 node that was previously injected (1 h) with CXCL12 (25 ng/ml) or the vehicle  
843 (PBS). The venules were identified as IV to I. Scale bar: 25  $\mu$ m; n=5. B)  
844 Quantification of recruited B cells C) Measurements of B cell flux. D)  
845 Measurements of B cell flux at 5 minutes. E) Numbers of adherent B cells. The  
846 quantifications were performed in the different venules (IV to I), n=5. Data are  
847 represented as mean  $\pm$  SEM. \*\*\* p<0.001, \*\*p<0.01 \*p<0.05.

848 **Fig 2. The lack of Myo1e causes a reduction in the slow rolling and the**  
849 **velocity of activated B lymphocytes.**

850 A) Representative images of the migration of activated B cells (stained with  
851 Hoescht 33342) from Myo1e<sup>+/+</sup> and Myo1e<sup>-/-</sup> mice in the venules of an inguinal  
852 lymph node of a host Myo1e<sup>+/+</sup> mice. The inguinal lymph node was previously  
853 injected (1 h) with CXCL12 or vehicle (PBS). The arrows indicate the start of the  
854 route of B cells from venule IV to I (40x objective). Scale bars 25  $\mu$ m; n=5. B)  
855 Quantification of the numbers of activated Myo1e<sup>+/+</sup> and Myo1e<sup>-/-</sup> B cells  
856 performing rolling in the different venules (IV to I) of an inguinal lymph node of a  
857 host Myo1e<sup>+/+</sup> mice. n=5. Data are represented as mean  $\pm$  SEM.\*\*\* p<0.001,  
858 \*\*p<0.01 \*p<0.05. C) Quantification of numbers of activated Myo1e<sup>+/+</sup> and Myo1e<sup>-/-</sup>  
859 B cells performing slow rolling in the different venules (IV to I) of inguinal lymph  
860 node of host Myo1e<sup>+/+</sup> mice n=5. Data are represented as mean  $\pm$  SEM.\*\*\*  
861 p<0.001, \*\*p<0.01 \*p<0.05. D) Measurements of the velocity of displacement of  
862 activated B cells from of Myo1e<sup>+/+</sup> and Myo1e<sup>-/-</sup> from venule IV to I in the inguinal  
863 lymph node; n=5. Data are represented as mean  $\pm$  SEM. \*\*\* p<0.001, \*\*p<0.01  
864 \*p<0.05.

865 **Fig. 3 The absence of Myo1e affects the distance and the 2D motility in**  
866 **response to CXCL12**

867 A) Activated B cells from of Myo1e<sup>+/+</sup> and Myo1e<sup>-/-</sup> mice were deposited in the  
868 Zigmond chamber under a CXCL12 gradient and registered for 1 hour. Tracks of  
869 individual trajectories are presented in the plots; n=5. B) Measurement of the

870 direction ratio. C) Quantification of the accumulated and the Euclidian distances. D)  
871 Measurements of the velocity. The experiments were performed with resting or  
872 activated Myo1e<sup>+/+</sup> and Myo1e<sup>-/-</sup> B cells under a CXCL12 gradient; n=5. Data are  
873 represented as mean ± SEM. \*\*\* p<0.001, \*\*p<0.01 \*p<0.05.

874 **Fig. 4. The deficiency of Myo1e affects the transmigration and the length of**  
875 **protrusions of the membrane of activated B cells.**

876 A) One hundred thousand activated B cells from Myo1e<sup>+/+</sup> and Myo1e<sup>-/-</sup> mice were  
877 placed into each well in a 96 wells plate. Previously, the plate was coated with  
878 hyaluronic acid, fibronectin or poly-L-lysine for two hours; then, the wells were  
879 washed, and the cells adhered to the wells were stained with crystal violet. Finally,  
880 the cells were lysed, and the absorbance of the dye was determined at 590 nm;  
881 n=3. Data are represented as mean ± SEM. \*\*\* p<0.001, \*\*p<0.01 \*p<0.05. B)  
882 Activated B cells from of Myo1e<sup>+/+</sup> and Myo1e<sup>-/-</sup> mice were seeded in a trans-well  
883 chamber under a gradient of CXCL12 or only medium for four hours. Previously,  
884 the chambers were seeded with bEnd.3 cells until they formed a monolayer  
885 (usually two days). Migrating B cells were recovered from the bottom chamber and  
886 quantified by flow cytometry. Percentages of transmigration are presented in the  
887 graph; n=3. Data are represented as mean ± SEM. \*\*\* p<0.001, \*\*p<0.01 \*p<0.05.  
888 C) Representative images (63x objective) of activated Myo1e<sup>+/+</sup> and Myo1e<sup>-/-</sup> B  
889 cells under a gradient of CXCL12. Scale bars 5 µm; n=3. D) Measurement of the  
890 length of protrusions of activated Myo1e<sup>+/+</sup> and Myo1e<sup>-/-</sup> B cells. Data are  
891 represented as mean ± SEM. \*\*\* p<0.001, \*\*p<0.01 \*p<0.05.

892 **Fig. 5. Myo1e interacts with FAK and the lack of Myo1e causes a reduction in**  
893 **the localization of integrins.**

894 A) Representatives images (63x objective) of activated B cells from of Myo1e<sup>+/+</sup>  
895 and Myo1e<sup>-/-</sup> mice, under a CXCL12 gradient. The cells were stained with anti-LFA-  
896 1 (green) and DAPI (Blue). Scale bars 5 µm. B) The intensity of pixels in the  
897 protrusion of membrane of activated B cells from of Myo1e<sup>+/+</sup> and Myo1e<sup>-/-</sup> mice;  
898 was measured n=3. Data are represented as mean ± SEM. \*\*\* p<0.001, \*\*p<0.01  
899 \*p<0.05. C) Co-immunoprecipitation of Myo1e with focal adhesion kinase (FAK) in

900 resting and activated B cells; n=3. D) Western blot of the Tyrosine 397  
901 phosphorylation of FAK in activated B cells with or without stimulation with  
902 CXCL12; n=3. E) Densitometric analysis of tyrosine 397 phosphorylation of FAK;  
903 n=3. Data are represented as mean  $\pm$  SEM. \*\*\* p<0.001, \*\*p<0.01 \*p<0.05

904 **Fig. 6. Myo1e is critically required for spreading and requires the activation**  
905 **of AKT/RAC-1 pathway.**

906 A) Representatives images (63x objective) of activated B cells from Myo1e<sup>+/+</sup> and  
907 Myo1e<sup>-/-</sup> mice. B cells were seeded to spread over fibronectin for 1 hour, and then,  
908 they were stained with TRITC-Phalloidin. Scale bars 5  $\mu$ m; n=3. B) Quantification  
909 of the elliptical factor in Myo1e<sup>+/+</sup> and Myo1e<sup>-/-</sup> B cells; n=3. Data are represented  
910 as mean  $\pm$  SEM. \*\*\* p<0.001, \*\*p<0.01 \*p<0.05. C) Western blot of the active form  
911 of RAC-1 in activated Myo1e<sup>+/+</sup> and Myo1e<sup>-/-</sup> B cells, with or without stimulation of  
912 CXCL12; n=3. D) Densitometric analysis of the activity of RAC-1; n=3. Data are  
913 represented as mean  $\pm$  SEM. \*\*\* p<0.001, \*\*p<0.01 \*p<0.05. E) Western blot of  
914 Threonine 308 phosphorylation of AKT in activated B cells from of Myo1e<sup>+/+</sup> and  
915 Myo1e<sup>-/-</sup> mice, with or without stimulation of CXCL12; n=3. F) Densitometric  
916 analysis of Threonine 308 phosphorylation of AKT; n=3. Data are represented as  
917 mean  $\pm$  SEM. \*\*\* p<0.001, \*\*p<0.01 \*p<0.05.

918 **Fig. 7. The inhibition of PI3K affects the protrusion of the membrane of**  
919 **activated B cells and requires the FAK/PI3K/AKT pathway.**

920 Representative images (63x objective) of activated B cells from Myo1e<sup>+/+</sup> and  
921 Myo1e<sup>-/-</sup> mice under a gradient of CXCL12 and treatment with LY294002. Scale  
922 bars 5  $\mu$ m; n=3. B) Pixel intensity in the protrusion of the membrane of activated  
923 Myo1e<sup>+/+</sup> and Myo1e<sup>-/-</sup> B cells, under a gradient of CXCL12 and treatment with  
924 LY294002; n=3. Data are represented as mean  $\pm$  SEM. \*\*\* p<0.001, \*\*p<0.01  
925 \*p<0.05. C) Length of the protrusion of the membrane in activated Myo1e<sup>+/+</sup> and  
926 Myo1e<sup>-/-</sup> B cells under a gradient of CXCL12 and treatment with LY294002. All data  
927 shown are representative of three independent experiments performed. Data are  
928 represented as mean  $\pm$  SEM. p<0.05. D) Western blot of PI3K and p-Akt (Thr308)  
929 and p-FAK (Tyr397) phosphorylation and activity of RAC-1 in activated Myo1e<sup>+/+</sup>

930 and Myo1e<sup>-/-</sup> B cells under a gradient of CXCL12 and treatment with LY294002;  
931 n=3. Data are represented as mean ± SEM. \*\*\* p<0.001, \*\*p<0.01 \*p<0.05.

932

933



Figure 1

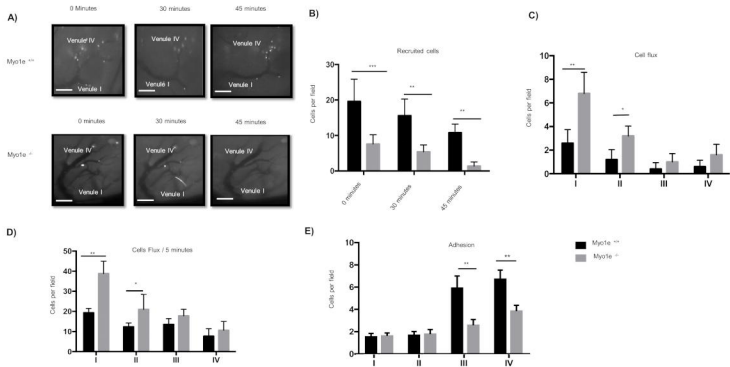

Figure 2

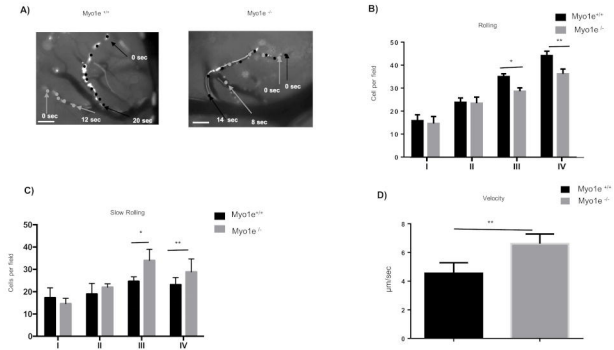

Figure 3

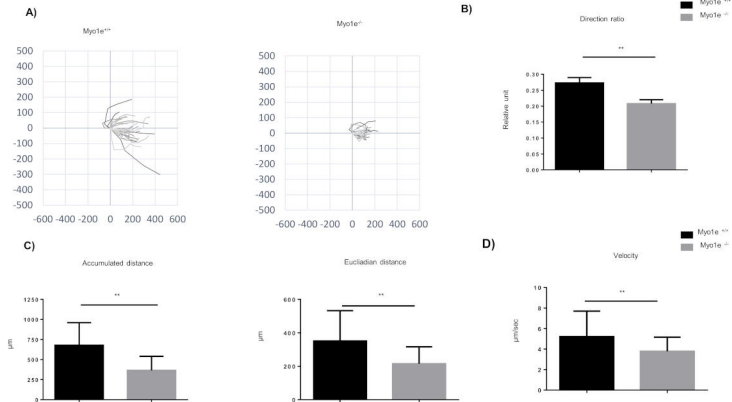

Figure 4

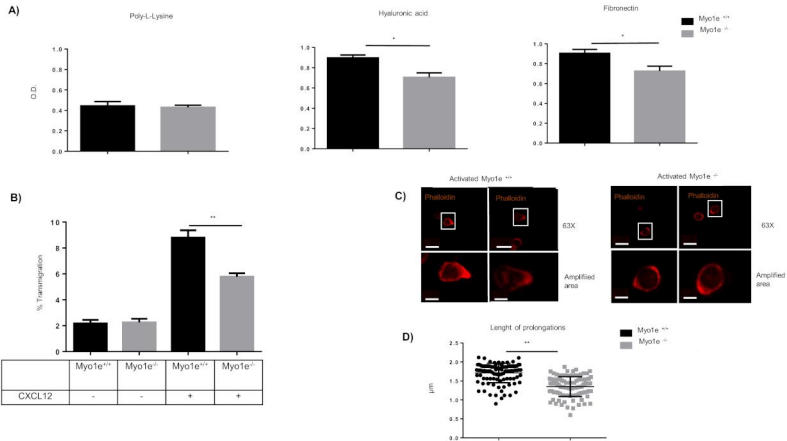

Figure 5

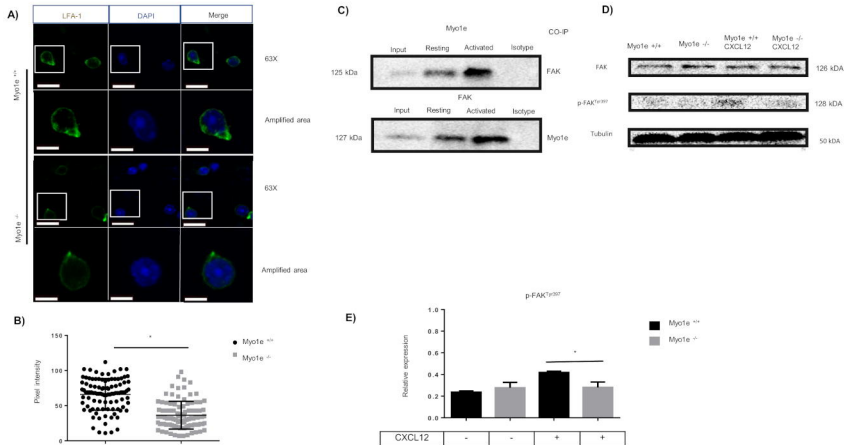

Figure 6

A)

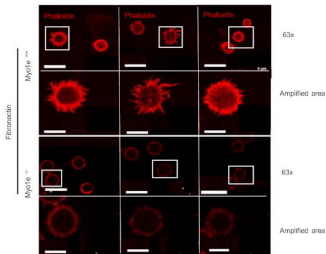

B)

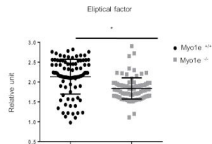

C)

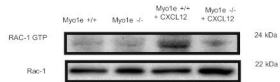

D)

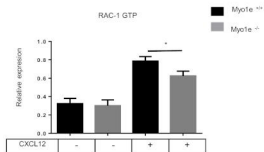

E)

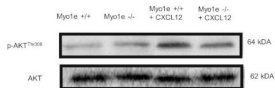

F)

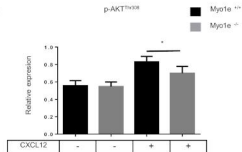

Figure 7

A)

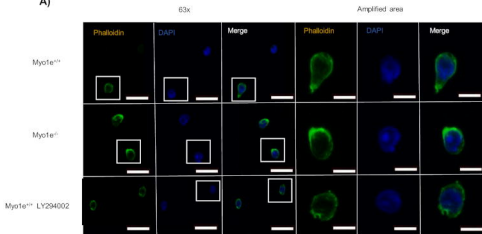

B)

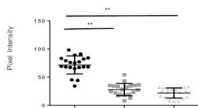

C)

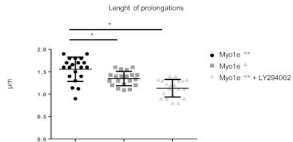

D)

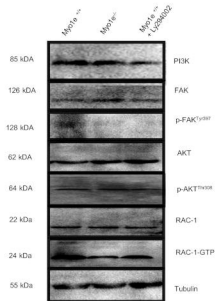

Source: https://www.biorxiv.org/content/10.1101/668608v1.full.pdf
